## Prize Crossword

NA Davies

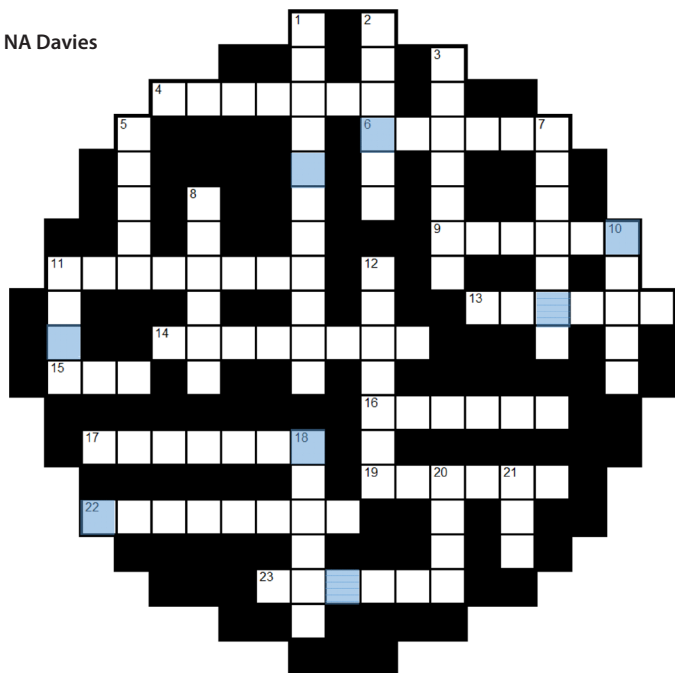

### Across

4. Inflammation of the pigmented layer between the retina and the cornea (7)
6. Same great formula, brand new shape (6)
9. Area that receives the image (6)
11. A waterfall or rapids; opaque area (8)
13. Near-sightedness (6)
14. Curvature on liquid surface (8)
15. The window to the soul (3)
16. Eyepiece of a microscope (6)
17. Relating to, producing or involving light (7)
19. Dense fibrous tunic of the outer eye (6)
22. Disease whereby pressure damages the optic disk (8)
23. Interior surface opposite the lens (6)

### Down

1. Defect of the lens causing distorted vision (11)
2. Experience of that which is yet to happen (6)
3. Unit of measurement for lens strength (7)
5. To set burning, as in a candle (5)
7. Alternative name for the alcohol form of Vitamin A (7)
8. Transparent anterior surface of the eye (6)
10. Maturation over time (5)
11. Ice cream receptacle (4)
12. Watery amusement (7)
18. Border between the cornea and sclera (6)
20. Industrial town in northern France (4)
21. Angling essential (3)

Solutions to the crossword featured in the April 2020 issue are: **Across:** 2. Ultradian, 6. Ganglion, 7. Fatigue, 8. Rhythm, 10. Hormone, 11. Zeitgebers, 15. Pineal, 16. Retina, 17. Thirst, 18. Food. **Down:** 1. Season, 3. Light, 4. Nocturnal, 5. Diurnal, 6. Germination, 9. Hibernation, 12. Tidal, 13. Melatonin, 14. Kinetic, 15. Period.

## Crossword Competition

### Win

This issue's crossword prize is a selection of spooky glow-in-the-dark goodies. Simply email the missing word, made up from letters in the highlighted boxes to [editorial@portlandpress.com](mailto:editorial@portlandpress.com), by Monday 4 January 2021.

Please include the words 'October crossword competition' in the email subject line. The winner will be announced in the February 2021 issue.

**Congratulations to the winner of the April competition:**  
*Jemima Onime, Imperial College London.*

**Congratulations to the winner of the June competition:**  
*Jacob Robinson.*

The missing word from the April issue's competition was *CIRCADIAN*. The missing word from the June issue's competition was *SCIENCE*.

Jemima received a caffeine keychain and a personalized grey A5 lined notebook. Jacob selected the charity In2scienceUK, a charity trying to help disadvantaged young people to get access to STEM careers. A donation was made to the charity in Jacob's name. If you would like to know more, visit <https://in2scienceuk.org/>.

**Terms and conditions:** only one entry per person, closing date Monday 4 January 2021. The winner will be drawn independently at random from the correct entries received. The winner will receive a glow-in-the-dark ghost in a bottle, a glow-in-the-dark ghost pin and a glow-in-the-dark face mask. No cash alternative available. No employee, agent, affiliate, officer or director of Portland Press Limited or the Biochemical Society is eligible to enter. The winner will be notified by email within 7 days of the draw. The name of the winner will be announced in the February issue of *The Biochemist*. The promoter accepts no responsibility for lost or delayed entries. Promoter: Biochemical Society, First Floor, 10 Queen Street Place, London EC4R 1BE; do not send entries to this address.

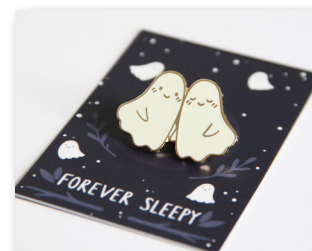

Source: https://port.silverchair.com/biochemist/article-pdf/42/5/84/895675/bio20200073.pdf
